# Supplementary material
Source: Springer Nature journal article supplement (https://www.springermedizin.de/resource/supplementary/12936_2006_350_MOESM2_ESM.pdf/9547616)

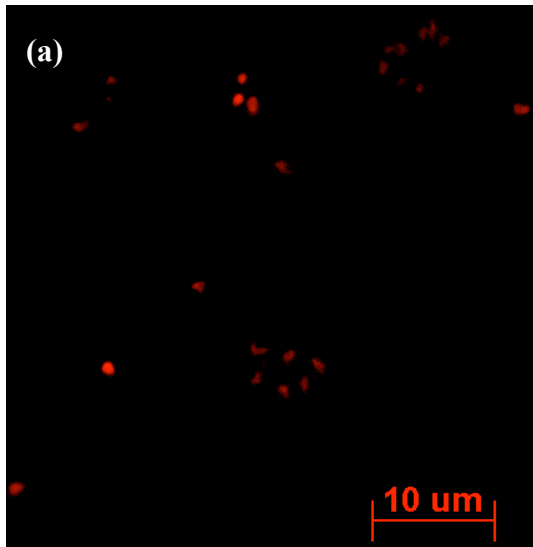

DAPI

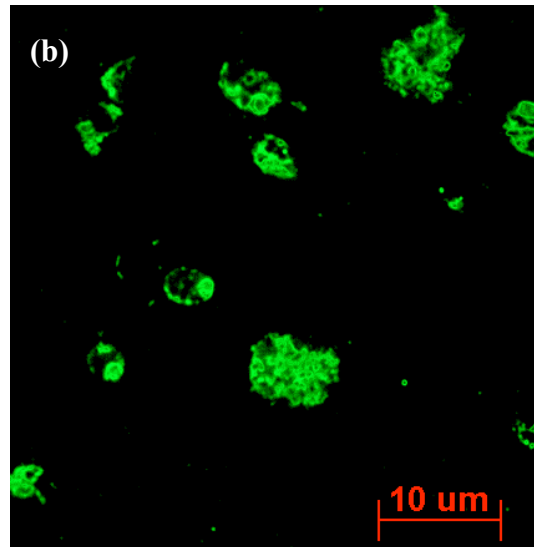

anti-r-Pfen antibodies

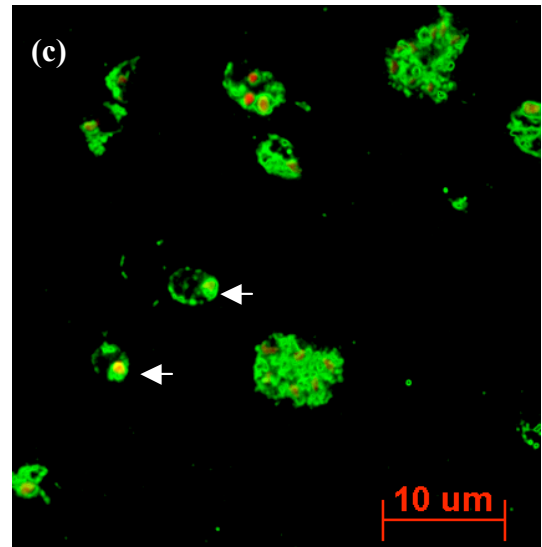

overlay

Supplement: MOESM2 [file 9547616]
